# Supplementary material for: A New N-Substituted 1H-Isoindole-1,3(2H)-Dione Derivative—Synthesis, Structure and Affinity for Cyclooxygenase Based on In Vitro Studies and Molecular Docking
Source: MDPI journal article supplement (doi:10.3390/ijms22147678), 2021-07-18

Supplementary material:

- I. The following fragmentation ions were found in the MS / MS spectrum of compound E:

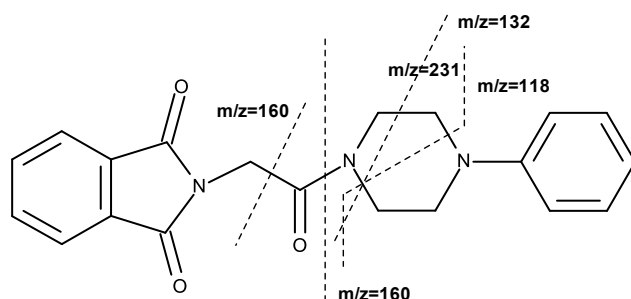

Table S1.

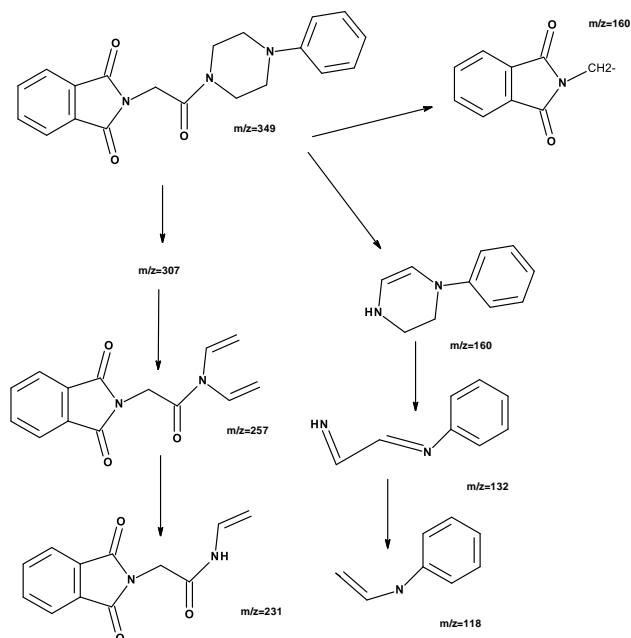

| Compound                  | MW  | Quazi-molecular Ion adduct | m/z |
|---------------------------|-----|----------------------------|-----|
| Substrat E                | 349 | M+H                        | 350 |
| Fragmentation product     | 306 | M+H                        | 307 |
| Fragmentation product     | 256 | M+H                        | 257 |
| Fragmentation product     | 230 | M+H                        | 231 |
| Fragmentation product(x2) | 159 | M+H                        | 160 |
| Fragmentation product     | 131 | M+H                        | 132 |
| Fragmentation product     | 117 | M+H                        | 118 |

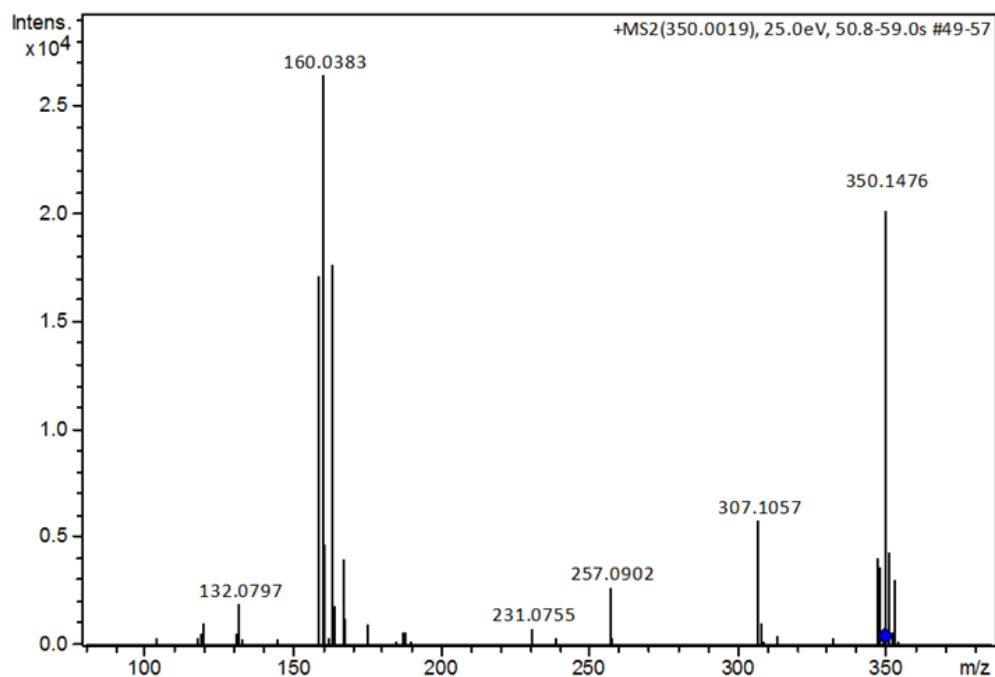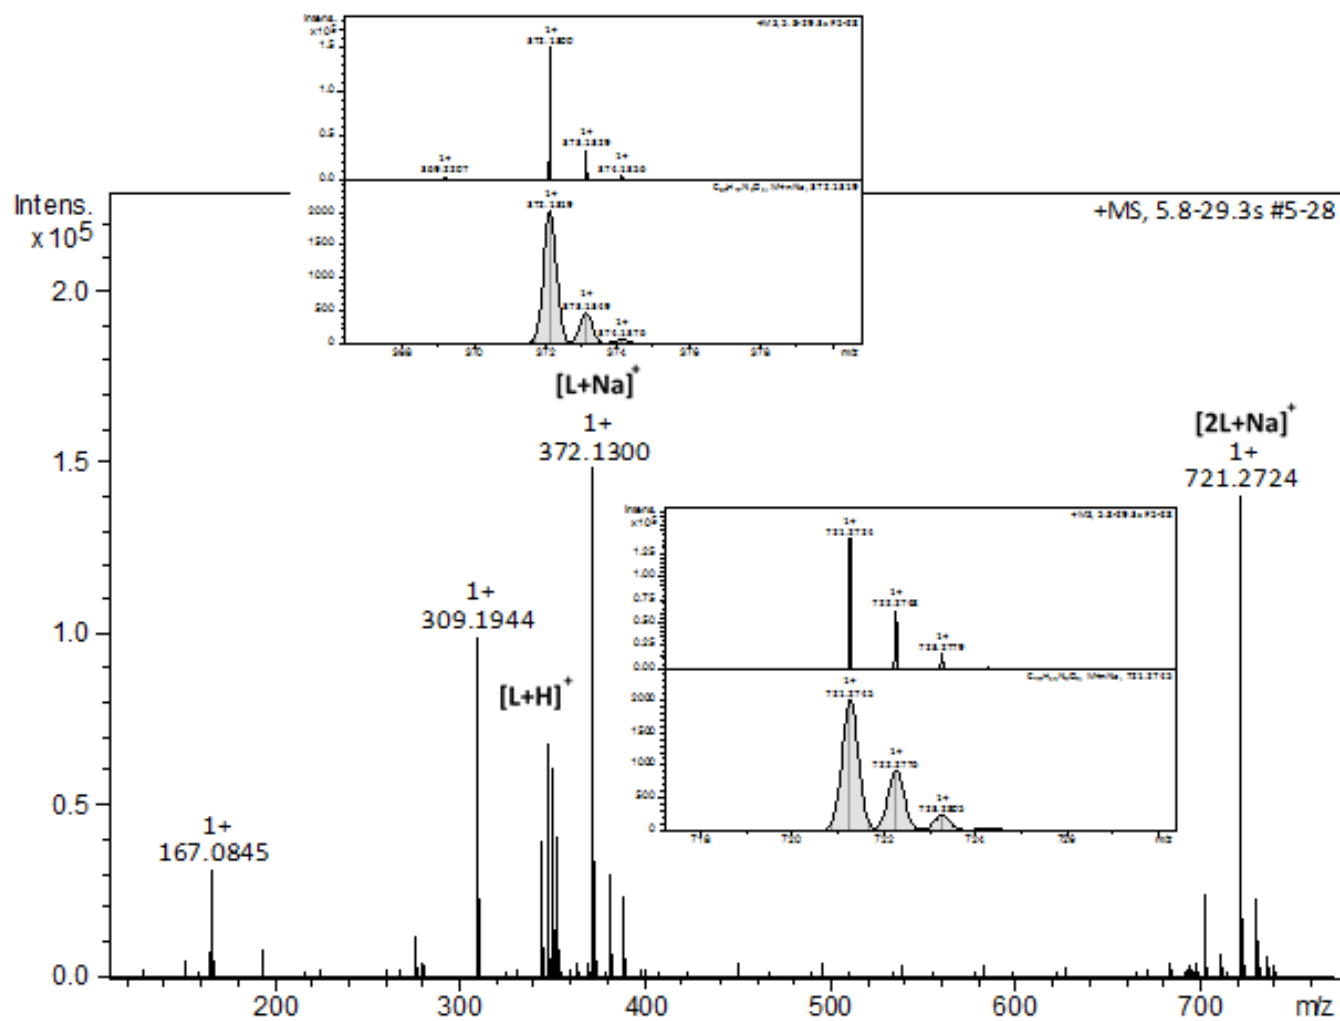

- II. The following fragmentation ions were found in the MS / MS spectrum of compound F:

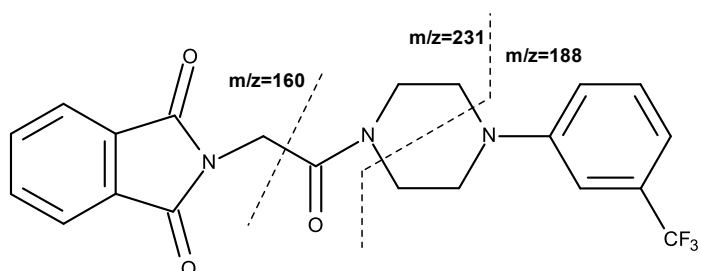

Table S2.

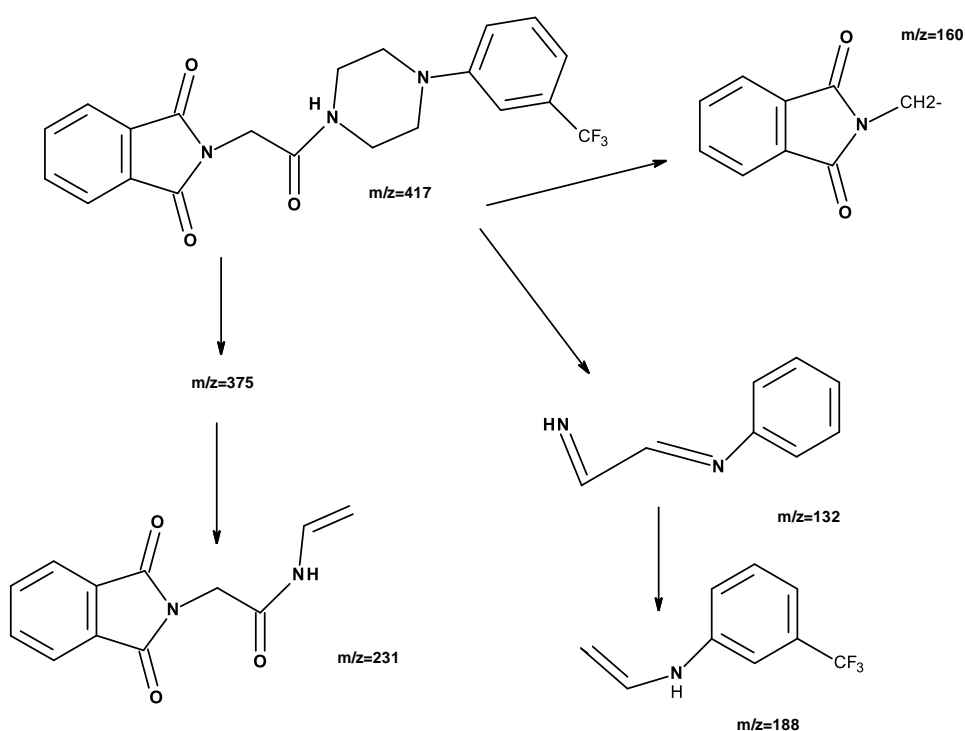

| Compound              | MW  | Pseudo-molecular ion adduct | m/z |
|-----------------------|-----|-----------------------------|-----|
| Substrat F            | 417 | M+H                         | 418 |
| Fragmentation product | 374 | M+H                         | 375 |
| Fragmentation product | 230 | M+H                         | 231 |
| Fragmentation product | 187 | M+H                         | 188 |
| Fragmentation product | 159 | M+H                         | 160 |

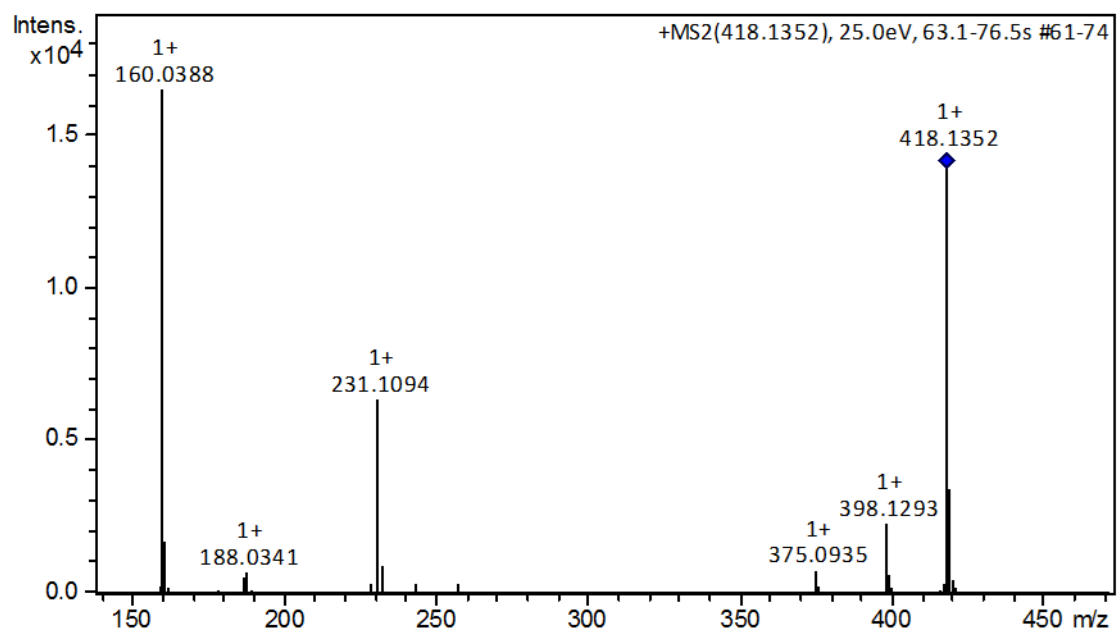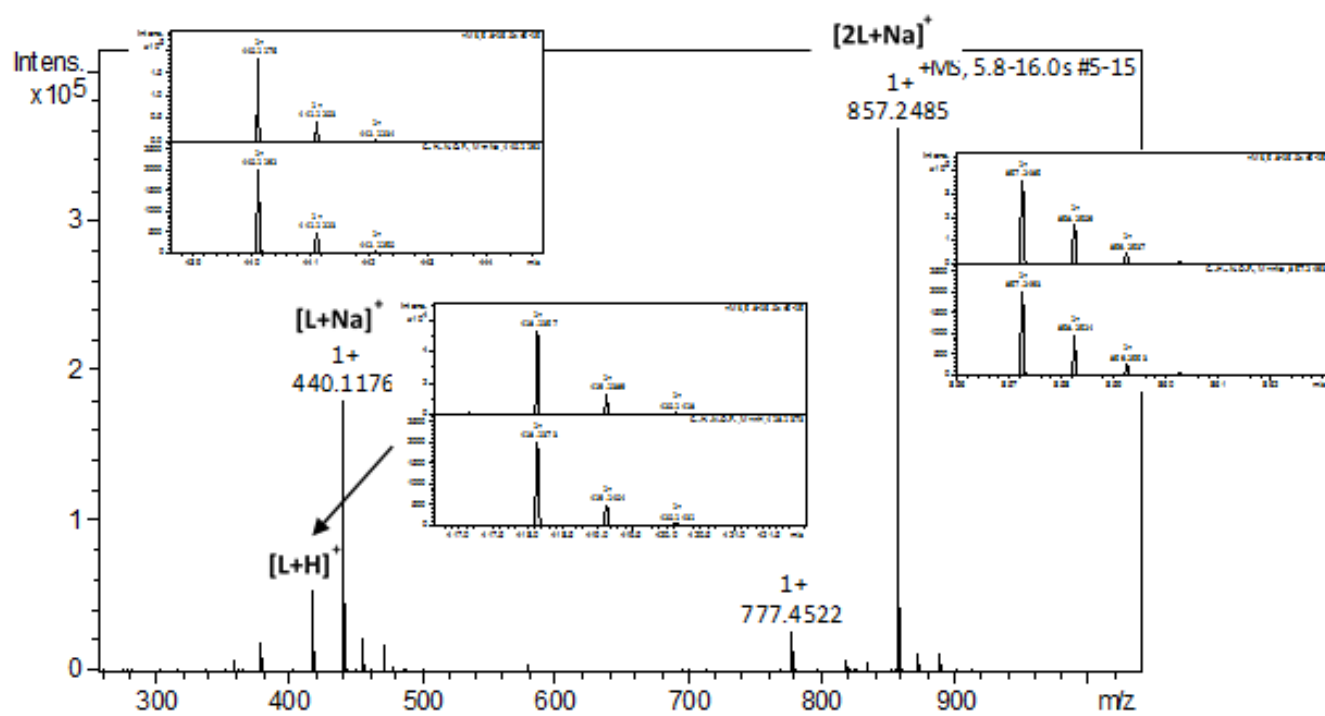

III. The following fragmentation ions were found in the MS / MS spectrum  
of compound **G**:

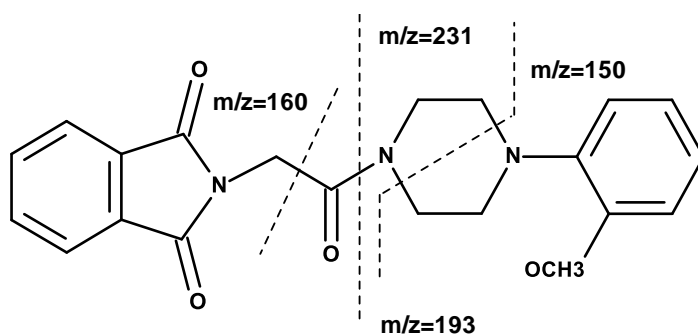

Table S3.

| Compound              | MW  | Quazi-molecular<br>Ion adduct | $m/z$ |
|-----------------------|-----|-------------------------------|-------|
| <b>Substrat G</b>     | 379 | M+H                           | 380   |
| Fragmentation product | 336 | M+H                           | 337   |
| Fragmentation product | 256 | M+H                           | 257   |
| Fragmentation product | 230 | M+H                           | 231   |
| Fragmentation product | 192 | M+H                           | 193   |
| Fragmentation product | 159 | M+H                           | 160   |
| Fragmentation product | 149 | M+H                           | 150   |

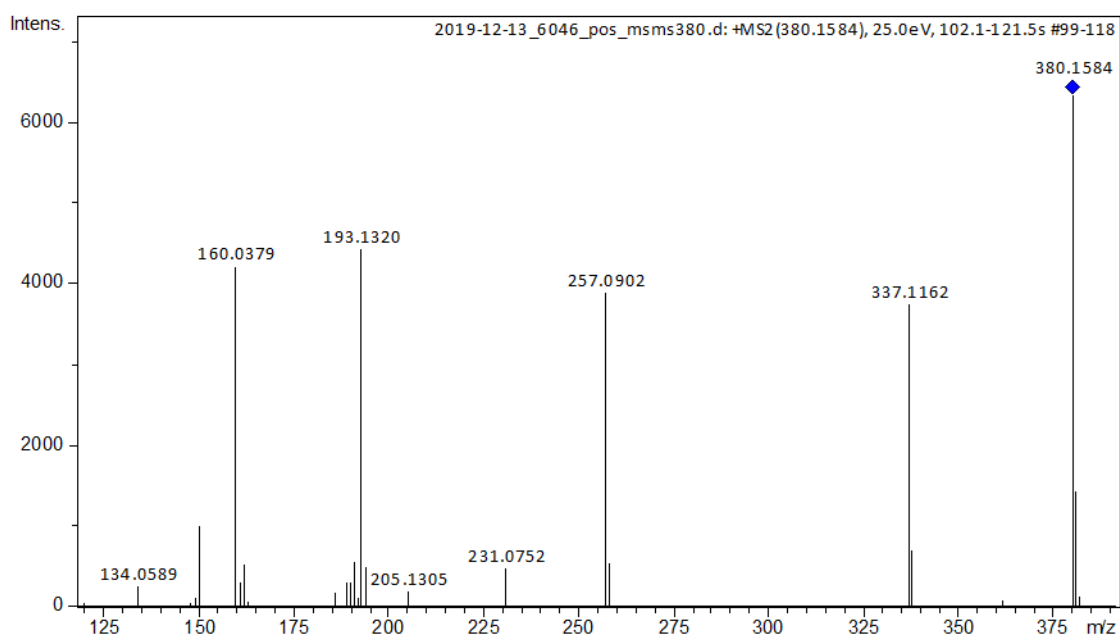

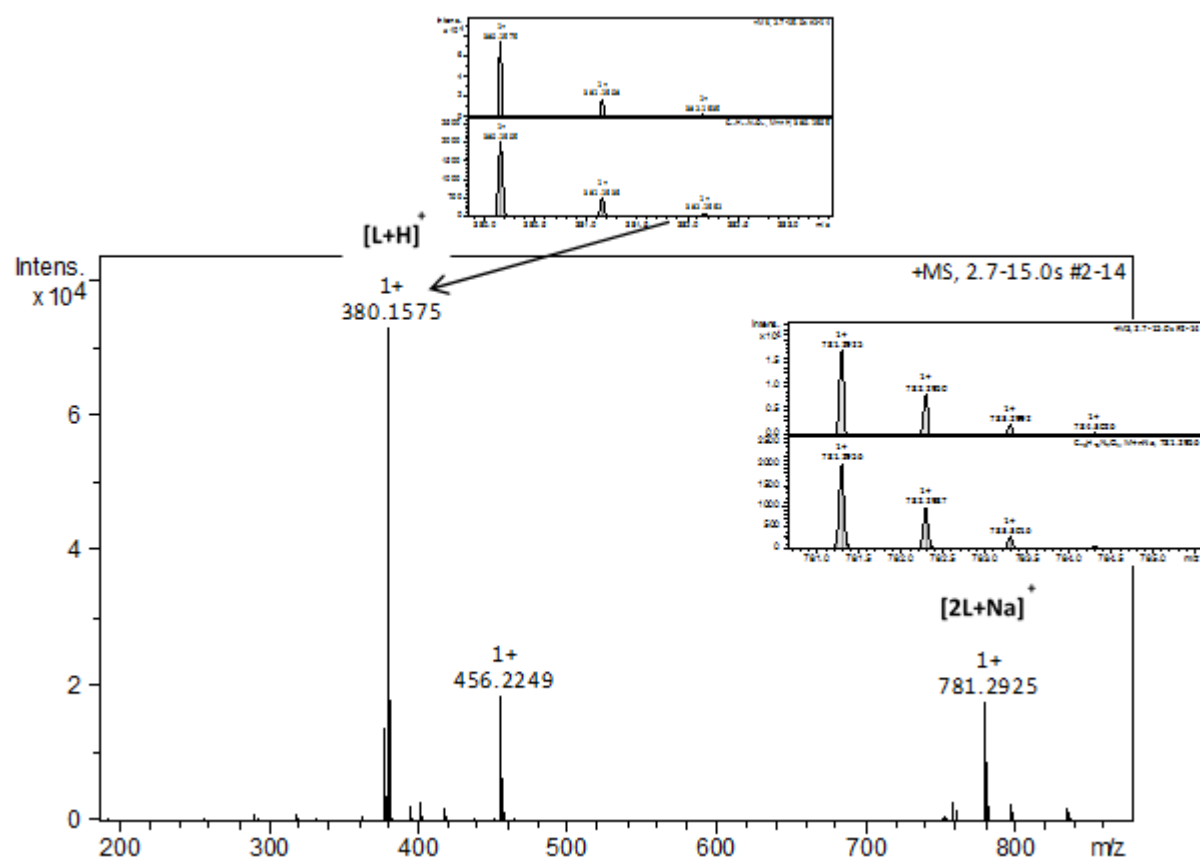

IV. The following fragmentation ions were found in the MS / MS spectrum of compound **H**:

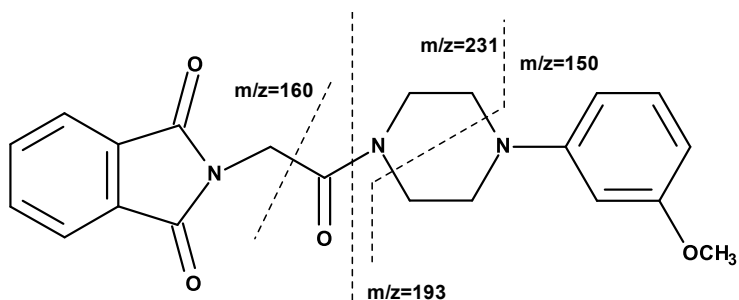

Table S4.

| Compound              | MW  | Quazi-molecular ion adduct | $m/z$ |
|-----------------------|-----|----------------------------|-------|
| Substrat <b>H</b>     | 379 | M+H                        | 380   |
| Fragmentation product | 336 | M+H                        | 337   |
| Fragmentation product | 256 | M+H                        | 257   |
| Fragmentation product | 230 | M+H                        | 231   |
| Fragmentation product | 192 | M+H                        | 193   |
| Fragmentation product | 159 | M+H                        | 160   |
| Fragmentation product | 149 | M+H                        | 150   |

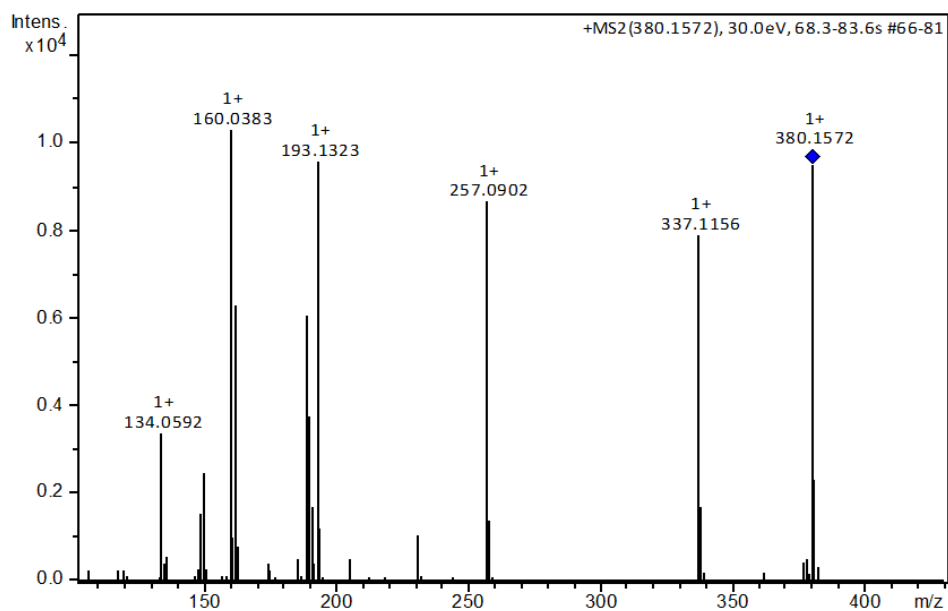

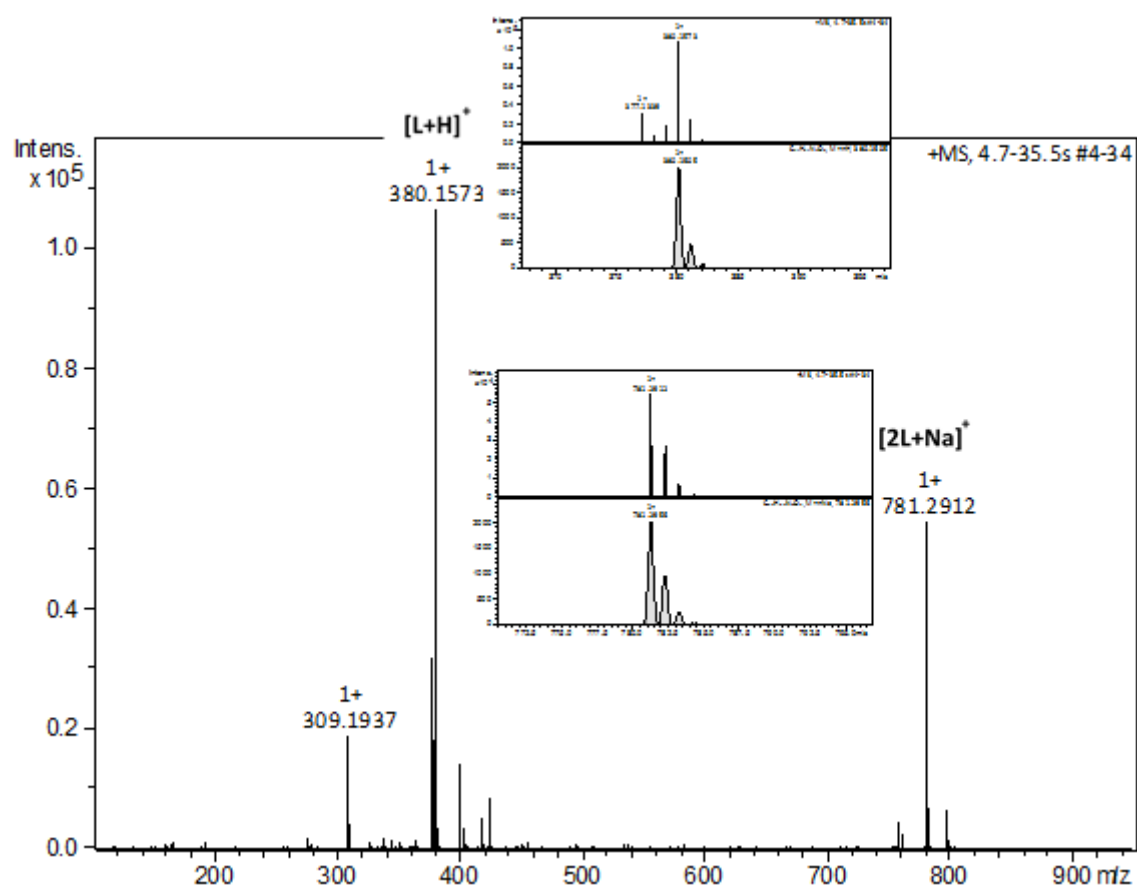



- V. The following fragmentation ions were found in the MS / MS spectrum of compound I:

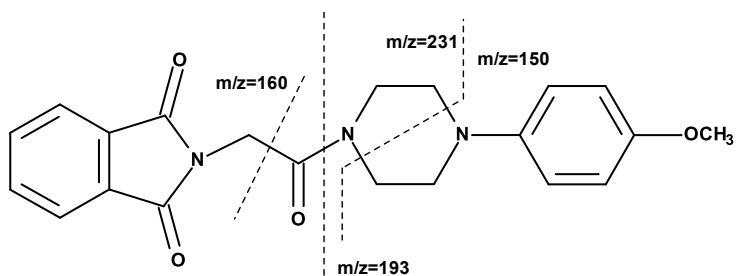

Table S5.

| compound              | MW  | Quazi-molecular ion adduct | m/z |
|-----------------------|-----|----------------------------|-----|
| Substrat I            | 379 | M+H                        | 380 |
| Fragmentation product | 336 | M+H                        | 337 |
| Fragmentation product | 256 | M+H                        | 257 |
| Fragmentation product | 230 | M+H                        | 231 |
| Fragmentation product | 192 | M+H                        | 193 |
| Fragmentation product | 159 | M+H                        | 160 |
| Fragmentation product | 149 | M+H                        | 150 |

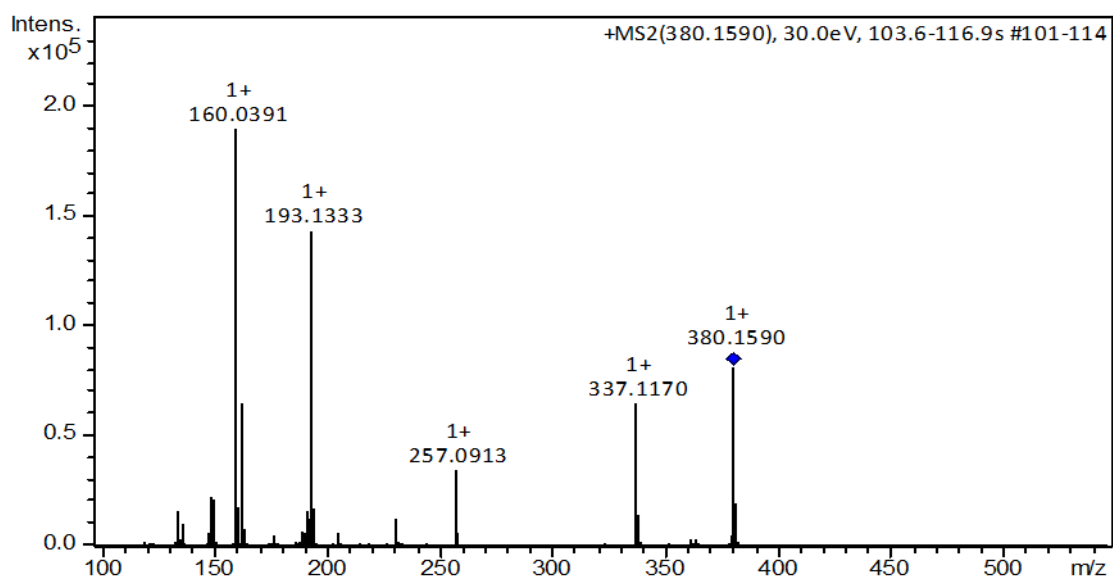

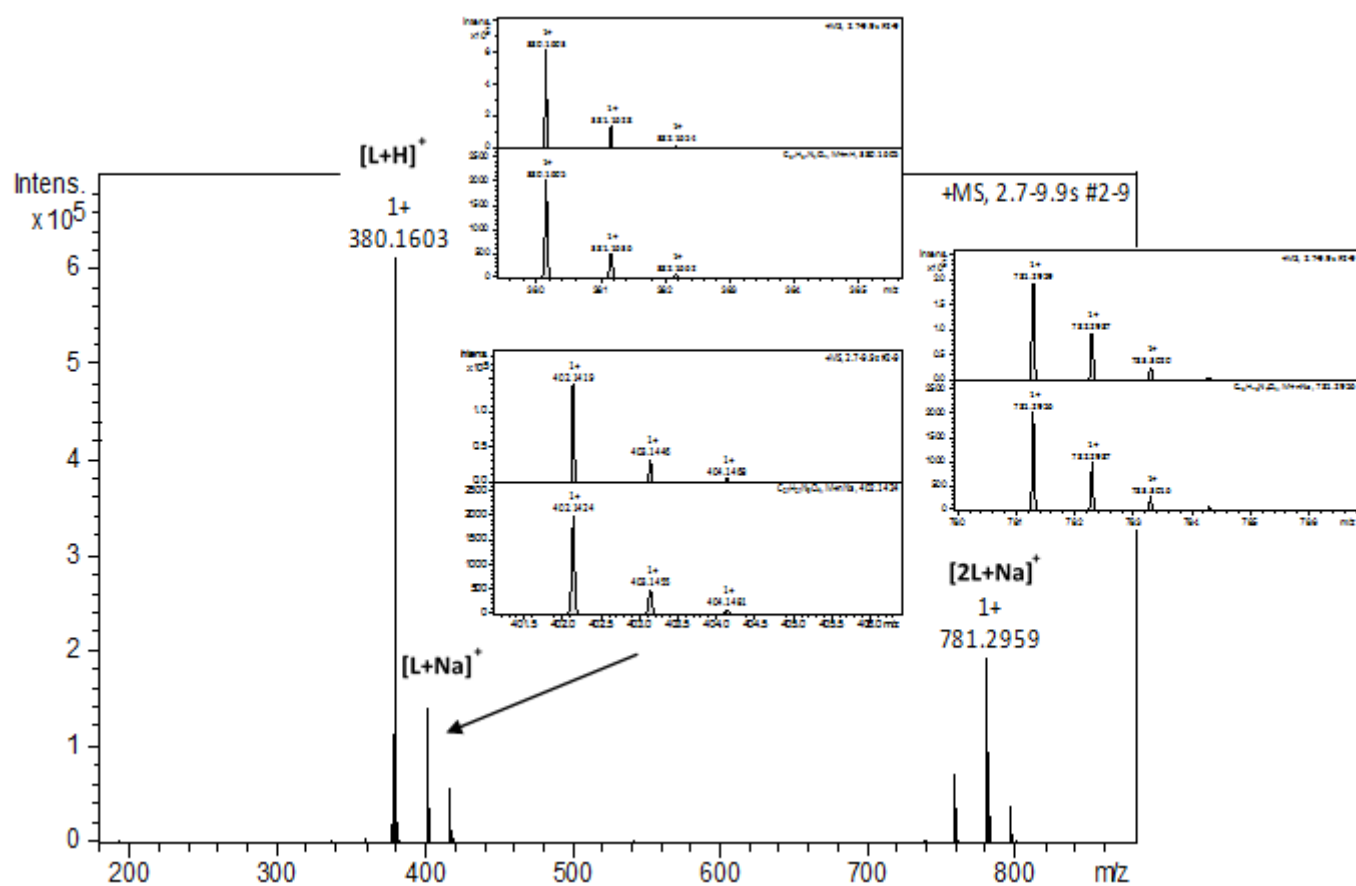

Scheme S1. The probable mechanism of G, H, I degradation in methanol solution, proposed on the basis of ESI-MS,(ad III, IV, V)

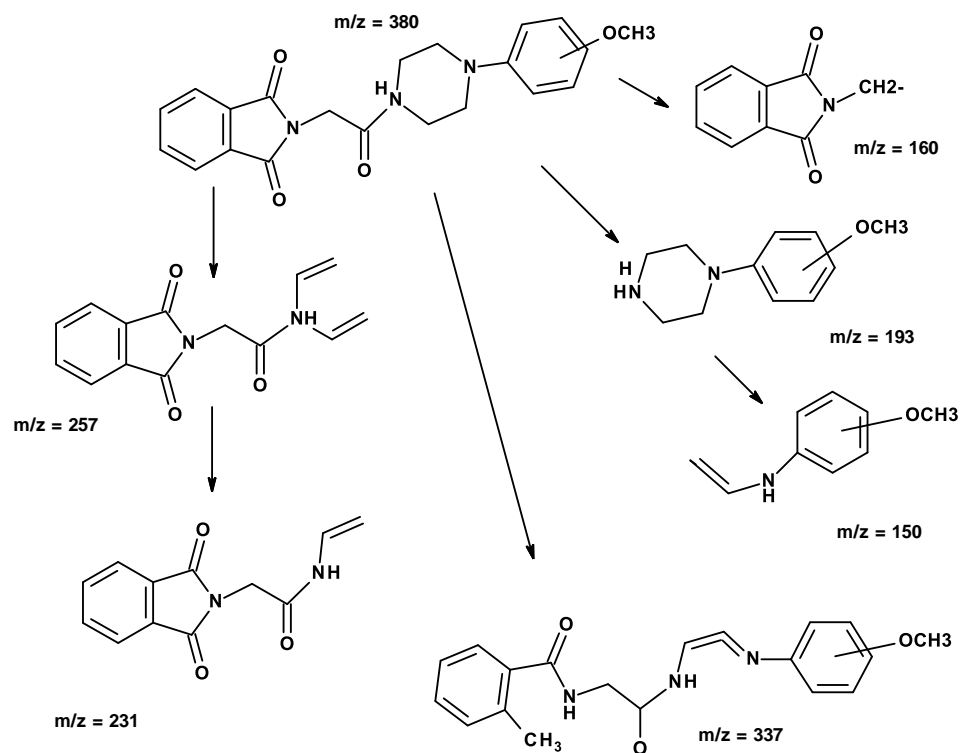

Supplement: s1 [file s1]
